# Supplementary material
Source: Springer Nature journal article supplement (https://www.springermedizin.de/resource/supplementary/12879_2012_2547_MOESM2_ESM.pdf/9444842)
Supplement: MOESM2 [file 9444842]

**Additional file 2. HI antibody responses in the per protocol immunogenicity cohort**

|                          |     | <b>AS03<sub>C</sub></b> | <b>AS03<sub>C</sub>-<br/>MPL25</b> | <b>AS03<sub>C</sub>-<br/>MPL50</b> | <b>AS03<sub>B</sub></b> | <b>AS03<sub>B</sub>-<br/>MPL25</b> | <b>AS03<sub>B</sub>-<br/>MPL50</b> | <b>AS03<sub>A</sub></b> | <b>AS03<sub>A</sub>-MPL25</b> | <b>Non-<br/>adjuvanted</b> | <b>Non-adjuvanted<br/>18–40y</b> |
|--------------------------|-----|-------------------------|------------------------------------|------------------------------------|-------------------------|------------------------------------|------------------------------------|-------------------------|-------------------------------|----------------------------|----------------------------------|
|                          |     | N=191                   | N=194                              | N=192                              | N=192                   | N=192                              |                                    | N=189                   | N=189                         | N=187                      | N=197                            |
| <b>A/Solomon Islands</b> |     |                         |                                    |                                    |                         |                                    |                                    |                         |                               |                            |                                  |
| GMT, value<br>(95% CI)   | D0  | 10.6<br>(9.3, 12.2)     | 10.6<br>(9.3, 12.1)                | 10.2<br>(8.9, 11.7)                | 10.8<br>(9.4, 12.4)     | 12.0<br>(10.3, 14.0)               | 10.3<br>(9.0, 11.9)                | 10.1<br>(8.8, 11.5)     | 9.9<br>(8.6, 11.3)            | 10.7<br>(9.2, 12.4)        | 21.3<br>(17.1, 26.5)             |
|                          | D21 | 82.3<br>(69.7, 97.1)    | 91.7<br>(76.9, 109.3)              | 78.5<br>(65.9, 93.5)               | 102.2<br>(87.0, 119.9)  | 113.2<br>(96.0, 133.6)             | 111.8<br>(93.3, 134.0)             | 98.2<br>(84.3, 114.3)   | 114.4<br>(97.1, 134.8)        | 59.6<br>(49.6, 71.7)       | 271.6<br>(224.6, 328.4)          |
| SCR, %<br>(95% CI)       | D21 | 69.6<br>(62.6, 76.1)    | 67.0<br>(59.9, 73.6)               | 67.2<br>(60.1, 73.8)               | 72.3<br>(65.3, 78.5)    | 74.0<br>(67.1, 80.0)               | 77.2<br>(70.6, 83.0)               | 81.5<br>(75.2, 86.7)    | 78.2<br>(71.7, 83.8)          | 52.9<br>(45.5, 60.3)       | 68.5<br>(61.5, 74.9)             |
| SPR, %<br>(95% CI)       | D0  | 14.1<br>(9.5, 19.9)     | 17.0<br>(12.0, 23.1)               | 11.5<br>(7.3, 16.8)                | 16.2<br>(11.3, 22.2)    | 22.9<br>(17.2, 29.5)               | 13.8<br>(9.2, 19.5)                | 13.2<br>(8.7, 18.9)     | 11.9<br>(7.7, 17.3)           | 16.6<br>(11.6, 22.7)       | 35.0<br>(28.4, 42.1)             |
|                          | D21 | 83.8<br>(77.8, 88.7)    | 81.4<br>(75.2, 86.7)               | 79.7<br>(73.3, 85.1)               | 87.5<br>(82.0, 91.8)    | 88.0<br>(82.6, 92.3)               | 86.2<br>(80.5, 90.8)               | 90.5<br>(85.4, 94.3)    | 89.1<br>(83.8, 93.1)          | 70.2<br>(63.1, 76.6)       | 92.4<br>(87.8, 95.7)             |
| SCF, %<br>(95% CI)       | D21 | 7.7<br>(6.5, 9.2)       | 8.6<br>(7.2, 10.4)                 | 7.7<br>(6.5, 9.2)                  | 9.4<br>(7.8, 11.3)      | 9.4<br>(8.0, 11.1)                 | 10.8<br>(9.0, 13.0)                | 9.8<br>(8.3, 11.5)      | 11.6<br>(9.7, 13.9)           | 5.6<br>(4.7, 6.8)          | 12.8<br>(10.0, 16.3)             |
| <b>A/Wisconsin</b>       |     |                         |                                    |                                    |                         |                                    |                                    |                         |                               |                            |                                  |
| GMT, value<br>(95% CI)   | D0  | 59.9<br>(49.5, 72.4)    | 65.7<br>(53.7, 80.4)               | 54.6<br>(44.5, 67.0)               | 51.2<br>(41.9, 62.4)    | 61.1<br>(50.6, 73.8)               | 57.8<br>(47.1, 70.9)               | 44.4<br>(36.5, 54.0)    | 55.8<br>(46.2, 67.4)          | 61.0<br>(49.8, 74.7)       | 47.8<br>(39.2, 58.4)             |
|                          | D21 | 276.2<br>(238.8, 319.6) | 309.2<br>(264.9, 361.0)            | 263.3<br>(225.3, 307.7)            | 350.2<br>(298.0, 411.4) | 331.1<br>(289.6, 378.6)            | 347.5<br>(296.4, 407.3)            | 351.3<br>(304.8, 404.8) | 438.1<br>(379.7, 505.4)       | 186.7<br>(158.0, 220.7)    | 380.2<br>(331.6, 435.9)          |
| SCR, %<br>(95% CI)       | D21 | 56.5<br>(49.2, 63.7)    | 53.6<br>(46.3, 60.8)               | 57.3<br>(50.0, 64.4)               | 64.9<br>(57.7, 71.7)    | 64.6<br>(57.4, 71.3)               | 69.3<br>(62.2, 75.8)               | 74.6<br>(67.8, 80.6)    | 73.6<br>(66.8, 79.6)          | 36.9<br>(30.0, 44.2)       | 66.0<br>(58.9, 72.6)             |
| SPR, %<br>(95% CI)       | D0  | 69.6<br>(62.6, 76.1)    | 71.6<br>(64.8, 77.9)               | 67.7<br>(60.6, 74.3)               | 64.9<br>(57.7, 71.7)    | 68.2<br>(61.1, 74.7)               | 70.9<br>(63.9, 77.3)               | 59.8<br>(52.4, 66.8)    | 72.0<br>(65.1, 78.2)          | 70.6<br>(63.5, 77.0)       | 61.9<br>(54.8, 68.7)             |

|                           |     | <b>AS03<sub>C</sub></b> | <b>AS03<sub>C</sub>-<br/>MPL25</b> | <b>AS03<sub>C</sub>-<br/>MPL50</b> | <b>AS03<sub>B</sub></b> | <b>AS03<sub>B</sub>-<br/>MPL25</b> | <b>AS03<sub>B</sub>-<br/>MPL50</b> | <b>AS03<sub>A</sub></b> | <b>AS03<sub>A</sub>-MPL25</b> | <b>Non-<br/>adjuvanted</b> | <b>Non-adjuvanted<br/>18–40y</b> |
|---------------------------|-----|-------------------------|------------------------------------|------------------------------------|-------------------------|------------------------------------|------------------------------------|-------------------------|-------------------------------|----------------------------|----------------------------------|
|                           | D21 | 98.4<br>(95.5, 99.7)    | 97.9<br>(94.8, 99.4)               | 97.4<br>(94.0, 99.1)               | 98.4<br>(95.5, 99.7)    | 100<br>(98.1, 100)                 | 97.9<br>(94.7, 99.4)               | 99.5<br>(97.1, 100)     | 99.0<br>(96.3, 99.9)          | 95.2<br>(91.1, 97.8)       | 100<br>(98.1, 100)               |
| SCF, %<br>(95% CI)        | D21 | 4.6<br>(3.9, 5.4)       | 4.7<br>(4.0, 5.5)                  | 4.8<br>(4.1, 5.7)                  | 6.8<br>(5.6, 8.1)       | 5.4<br>(4.6, 6.3)                  | 6.0<br>(5.1, 7.1)                  | 7.9<br>(6.6, 9.5)       | 7.8<br>(6.5, 9.5)             | 3.1<br>(2.6, 3.6)          | 7.9<br>(6.4, 9.8)                |
| <b>B/Malaysia</b>         |     |                         |                                    |                                    |                         |                                    |                                    |                         |                               |                            |                                  |
| GMT,<br>value<br>(95% CI) | D0  | 58.6<br>(49.8, 68.9)    | 62.6<br>(53.3, 73.4)               | 58.2<br>(49.0, 69.1)               | 53.7<br>(45.7, 63.2)    | 77.8<br>(66.0, 91.7)               | 62.6<br>(53.0, 74.0)               | 57.0<br>(48.2, 67.5)    | 62.9<br>(53.9, 73.4)          | 66.5<br>(56.5, 78.3)       | 23.4<br>(19.1, 28.7)             |
|                           | D21 | 147.1<br>(129.1, 167.6) | 152.4<br>(134.4, 172.7)            | 155.7<br>(134.8, 179.8)            | 163.1<br>(142.5, 186.6) | 181.4<br>(158.9, 207.1)            | 174.6<br>(152.0, 200.7)            | 172.1<br>(149.9, 197.6) | 202.0<br>(179.7, 227.1)       | 153.0<br>(135.2, 173.1)    | 281.9<br>(241.7, 328.7)          |
| SCR, %<br>(95% CI)        | D21 | 24.6<br>(18.7, 31.3)    | 22.7<br>(17.0, 29.2)               | 26.0<br>(20.0, 32.9)               | 38.2<br>(31.3, 45.5)    | 23.4<br>(17.6, 30.1)               | 29.1<br>(22.7, 36.1)               | 34.4<br>(27.6, 41.6)    | 40.9<br>(33.9, 48.2)          | 25.1<br>(19.1, 32.0)       | 74.6<br>(67.9, 80.5)             |
| SPR, %<br>(95% CI)        | D0  | 72.3<br>(65.3, 78.5)    | 76.3<br>(69.7, 82.1)               | 72.4<br>(65.5, 78.6)               | 73.3<br>(66.4, 79.4)    | 81.3<br>(75.0, 86.5)               | 76.7<br>(70, 82.5)                 | 73.0<br>(66.1, 79.2)    | 77.2<br>(70.6, 82.9)          | 77.0<br>(70.3, 82.8)       | 39.1<br>(32.2, 46.3)             |
|                           | D21 | 95.8<br>(91.9, 98.2)    | 96.4<br>(92.7, 98.5)               | 94.8<br>(90.6, 97.5)               | 95.3<br>(91.3, 97.8)    | 96.9<br>(93.3, 98.8)               | 97.4<br>(93.9, 99.1)               | 97.4<br>(93.9, 99.1)    | 99.5<br>(97.1, 100)           | 97.3<br>(93.9, 99.1)       | 99.0<br>(96.4, 99.9)             |
| SCF, %<br>(95% CI)        | D21 | 2.5<br>(2.2, 2.8)       | 2.4<br>(2.2, 2.8)                  | 2.7<br>(2.3, 3.1)                  | 3.0<br>(2.6, 3.5)       | 2.3<br>(2.1, 2.6)                  | 2.8<br>(2.4, 3.2)                  | 3.0<br>(2.6, 3.5)       | 3.2<br>(2.8, 3.7)             | 2.3<br>(2.0, 2.6)          | 12.0<br>(9.7, 15.0)              |

HI, hemagglutination-inhibition; CI, confidence interval; GMT, geometric mean titer; HI SCR, seroconversion rate (proportion with pre-vaccination titer <1:10 and a post-vaccination titer ≥1:40, or a pre-vaccination titer ≥1:10 and at least a four-fold increase in post-vaccination titer); SPR, seroprotection rate (as proportion of subjects with HI antibody titers ≥ 1:40); SCF, seroconversion factor (geometric mean of the within subject ratios of reciprocal HI antibody titers for post-vaccination versus pre-vaccination). All participants received inactivated trivalent influenza vaccine, non-adjuvanted (non-adjuvanted ≥65 years and control 18–40 years) or formulated with an adjuvant. AS03 is a squalene and α-tocopherol oil-in-water emulsion-based Adjuvant System, with tocopherol content 11.86 mg (A), 5.93 mg (B), or 2.97 mg (C); MPL is 3-O-desacyl-4'-monophosphoryl lipid A: 25 µg (MPL-25) or 50 µg (MPL-50).
